# Supplementary material for: Calf thymus DNA-stabilized polythiophene fluorescence probe for label-free detection of spermine
Source: Royal Society of Chemistry journal article supplement (doi:10.1039/c2an35952a), 2012-01-01
Supplement: c2an35952a.pdf [file c2an35952a.pdf]

## Electronic Supporting Information

*for*

### **Calf Thymus DNA-Stabilized Polythiophene Fluorescence Probe for Label-Free Detection of Spermine †**

**Jian Wang,<sup>a</sup> Qing Zhang,<sup>b</sup> Zhong De Liu<sup>a</sup> and Cheng Zhi Huang<sup>a,\*</sup>**

<sup>a</sup> *Education Ministry Key Laboratory on Luminescence and Real-Time Analysis, College of Pharmaceutical Sciences, and* <sup>b</sup> *College of Chemistry and Chemical Engineering, Southwest University, Chongqing 400715, China*

*Tel: +86-23-68254659. Fax: +86-23-68866796. E-mail: chengzhi@swu.edu.cn. (C. Z. Huang).*

## Figures

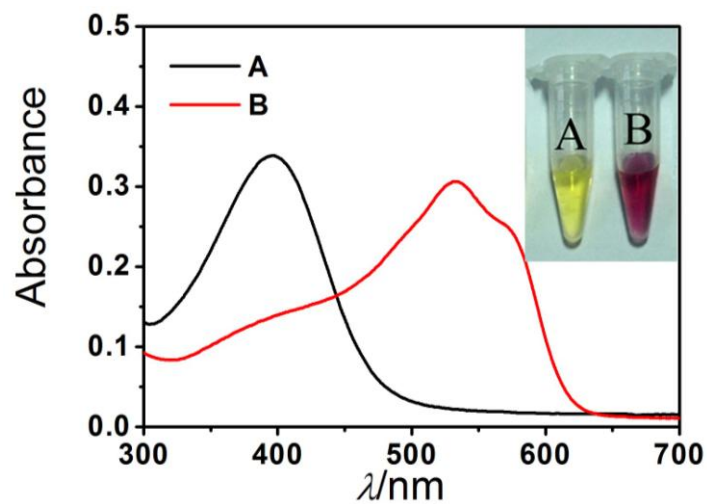

**Fig. S1** Absorption spectra and the corresponding color change of polythiophene in the presence of KI. A, polythiophene; B, polythiophene+KI. Concentrations: polythiophene,  $1.5 \times 10^{-4}$  M; KI, 2.5 mM.

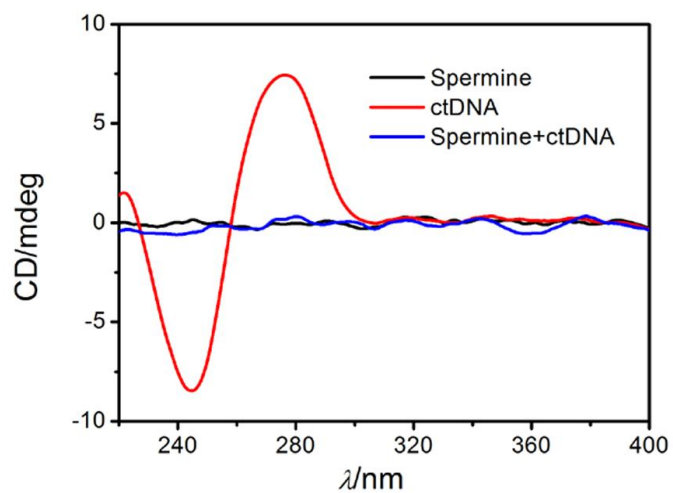

**Fig. 2** Circular dichroism spectra of spermine and ctDNA. Concentrations: ctDNA, 0.1 mg/mL; spermine, 40.0  $\mu$ M; pH 5.78.

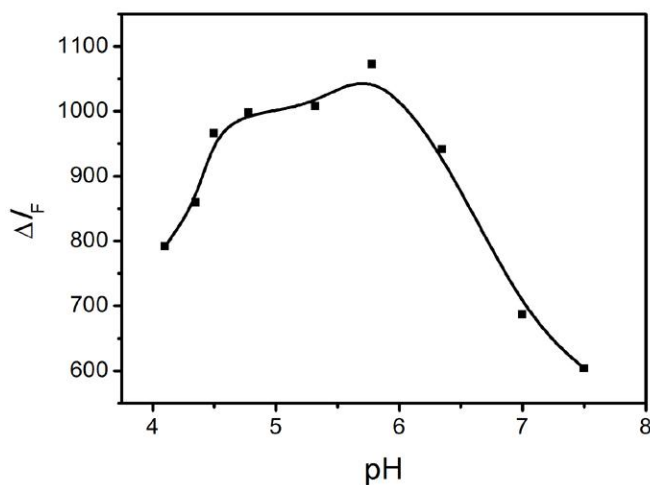

**Fig. S3** The dependence of the fluorescence intensity on pH.  $\Delta I_F = I - I^0$ ;  $I$ , fluorescence of ctDNA/polythiophene/KI;  $I^0$ , fluorescence of spermine/ctDNA/polythiophene/KI. Concentrations: polythiophene,  $1.5 \times 10^{-4}$  M; ctDNA, 0.1 mg/mL; KI, 2.5 mM; spermine, 40.0  $\mu$ M.

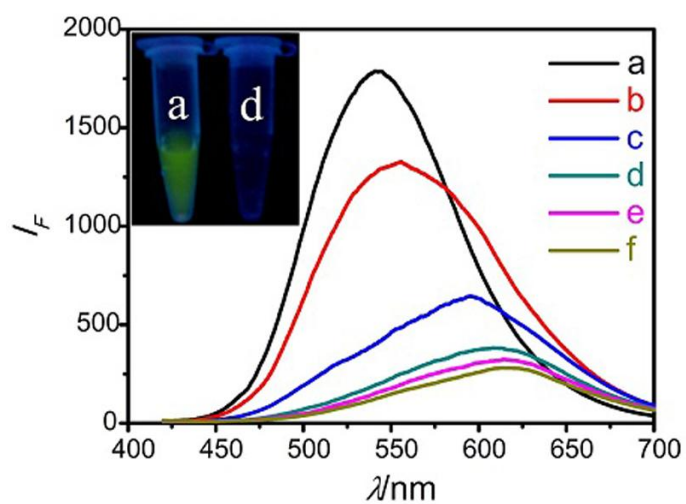

**Fig. S4** The fluorescence emission spectra and fluorescence imaging of polythiophene in the presence of KI. a, polythiophene; b-f, polythiophene/KI. Concentrations: polythiophene,  $1.5 \times 10^{-4}$  M; KI (from a to f), 0, 0.625, 1.25, 2.5, 3.75, 5.0 mM; pH 5.78
